# Supplementary material for: Aberrant Phenotype in Human Endothelial Cells of Diabetic Origin: Implications for Saphenous Vein Graft Failure?
Source: J Diabetes Res. 2015 Apr 8;2015:409432. doi: 10.1155/2015/409432 (PMC4407531; doi:10.1155/2015/409432)
Supplement: Supplementary file 1 — ND-EC proliferation. Ptychographic time-lapse video of ND-EC over 3 days, showing clear evidence of cell division (proliferation) over the course of the assay. Supplementary File 2: T2DM-EC proliferation. Ptychographic time-lapse video of T2DM-EC over 3 days. In the final frames, only one apoptotic cell was visible (lower right-hand side of the frame). Supplementary File 3: ND-EC angiogenesis. Ptychographic time-lapse video of ND-EC tube formation. Recording commenced 2 h post-plating and video was collated from hourly images. Tubes with robust walls were observed forming and expanding over the course of the assay. Supplementary File 4: T2DM-EC angiogenesis. Ptychographic time-lapse video of T2DM-EC tube formation. Recording commenced 2 h post-plating and video was collated from hourly images. Whilst tubes formed and rapidly expanded over the course of the assay, tube walls appeared narrower than those observed in ND-EC. [file 409432.f1.zip]

Archive with 5 entries (4 files):
- 409432.f1/
- 409432.f1/Supplementary File 1.mp4
- 409432.f1/Supplementary File 2.mp4
- 409432.f1/Supplementary File 3.mp4
- 409432.f1/Supplementary File 4.mp4
